# Supplementary material for: A New Method for Rapid Subcellular Localization and Gene Function Analysis in Cotton Based on Barley Stripe Mosaic Virus
Source: MDPI journal article supplement (doi:10.3390/plants11131765), 2022-07-01
Supplement: s1 [file s1]

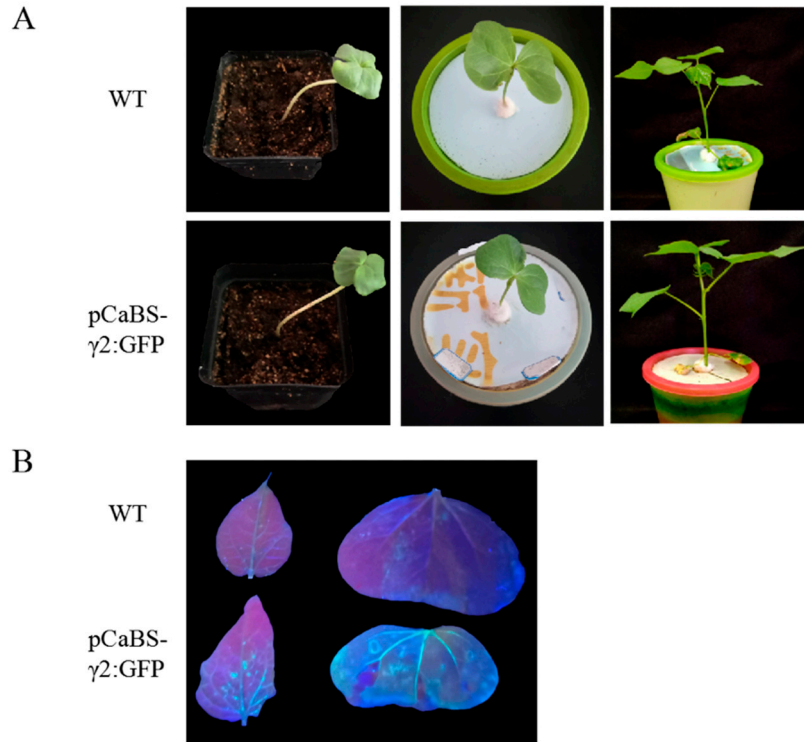

**Figure S1.** Seed imbibition method does not affect cotton growth and can stably express gene over a long period of time. A. The growth of cotton under different treatment methods, from left to right, are soil culture stage, hydroponic stage, and 4-6 true leaf stage; B. Fluorescence of real leaves (left) and cotyledons (right) of cotton in the true leaf stage under ultraviolet light.

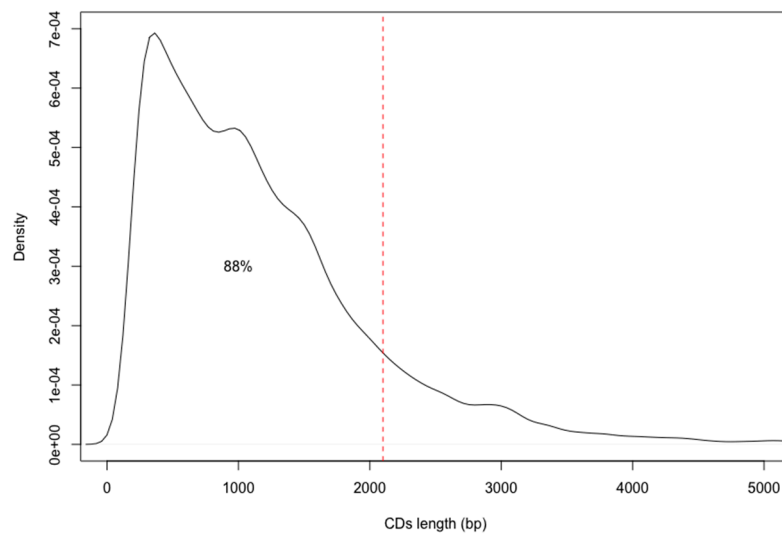

**Figure S2.** Gene length density of cotton.

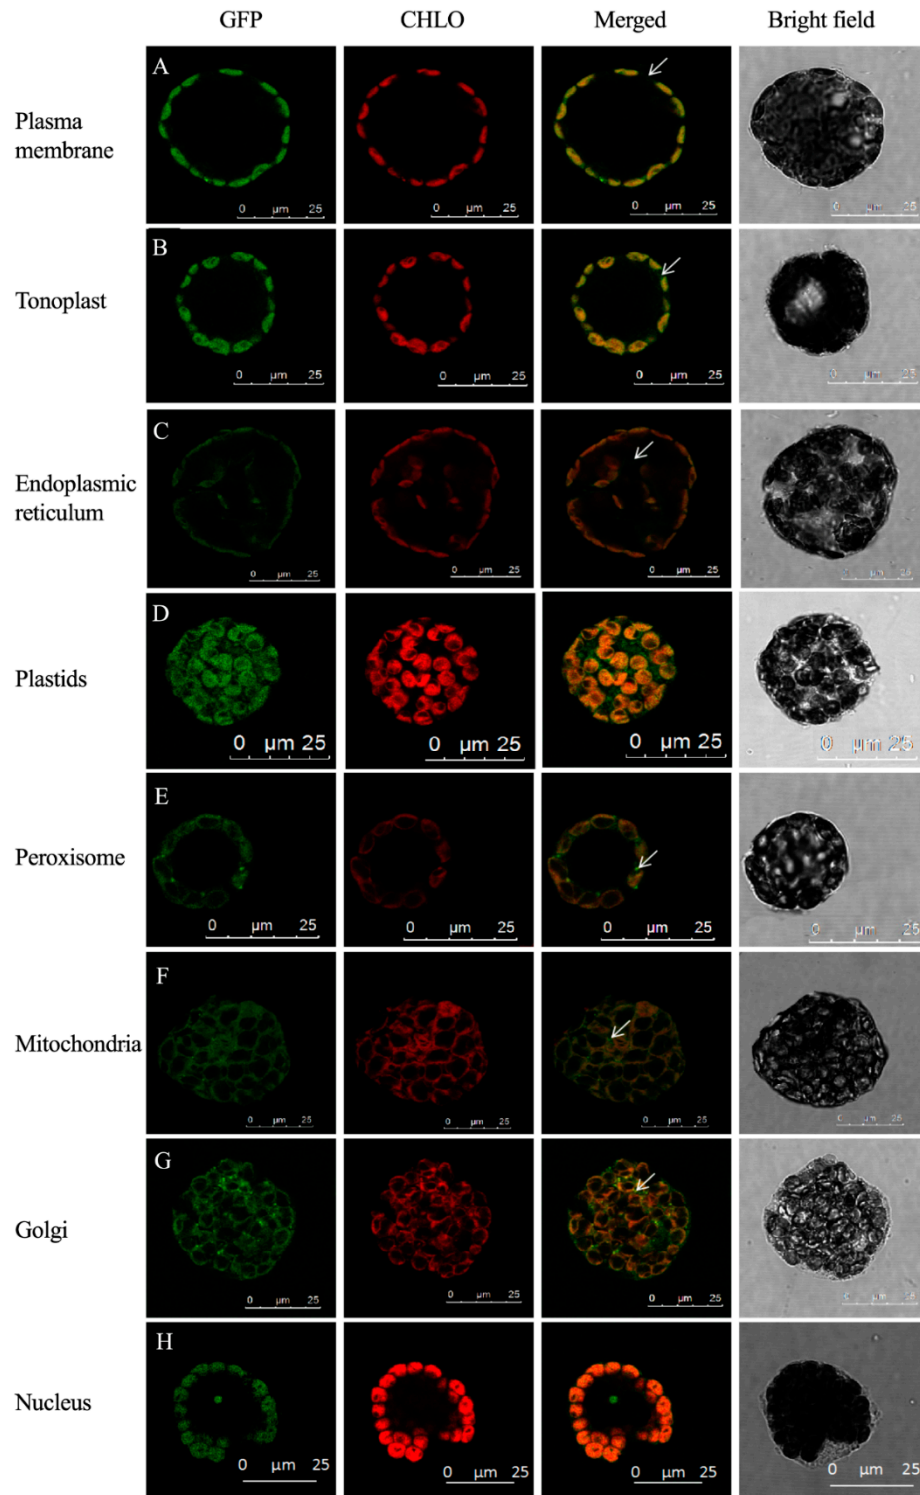

**Figure S3.** Ti vector transient transformation-mediated subcellular localization of GFP fusion-marker genes targeting in cotton protoplast. The localization constructs were transiently expressed in cotton protoplasts by PEG-mediated transformation and observed by confocal microscopy. A. The green fluorescence of *GhPIP2:GFP* was expressed transiently in the plasma membrane; B. The tonoplast marker *GhTIP2:GFP* was found in the membrane protruding into the interior of the cell; C. Fluorescence of endoplasmic reticulum marker *GhSPP:GFP* in cotton protoplasts revealed the typical network morphology of the ER; D. The plastid marker *GhClpD:GFP* in cotton protoplasts showed GFP fluorescence completely overlapped with chloroplast auto-fluorescence; E. The fluorescence of the peroxisomal marker *GhAPX3:GFP* showed as spherical spots localized near chloroplasts; F. The typical granular, thread and randomly distributed mitochondria were observed in leaf protoplasts about marker *GhALDH2:GFP*; G.

The fluorescence of the Golgi marker *GhMNS1:GFP* showed a punctate staining pattern smaller than 1  $\mu\text{m}$ ; H. The green fluorescence of the final marker *GhTAF2:GFP* was well targeted to the nucleus of the protoplasts.

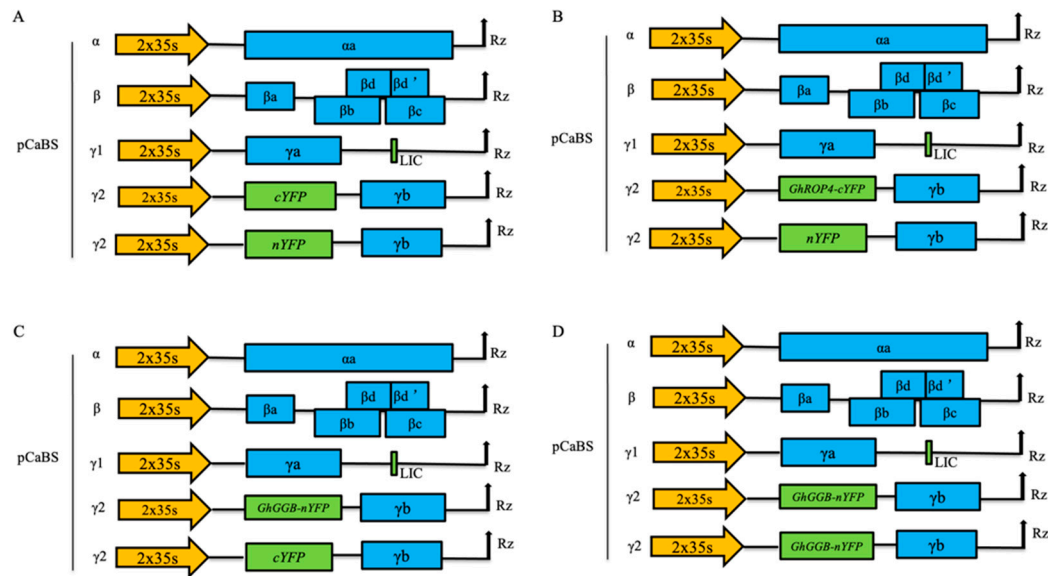

**Figure S4.** Schematic representation of BSMV recombinant constructs used for BiFC assay. A. The pCaBS- $\gamma$ 2:nYFP (amino acids 1 to 156; nYFP) + pCaBS- $\gamma$ 2:cYFP (amino acids 157 to 239; cYFP); B. pCaBS- $\gamma$ 2:GhROP4-cYFP + pCaBS- $\gamma$ 2:nYFP; C. pCaBS- $\gamma$ 2:GhGGB-nYFP and pCaBS- $\gamma$ 2:cYFP; D. pCaBS- $\gamma$ 2:GhROP4-cYFP + pCaBS- $\gamma$ 2:GhGGB-nYFP.

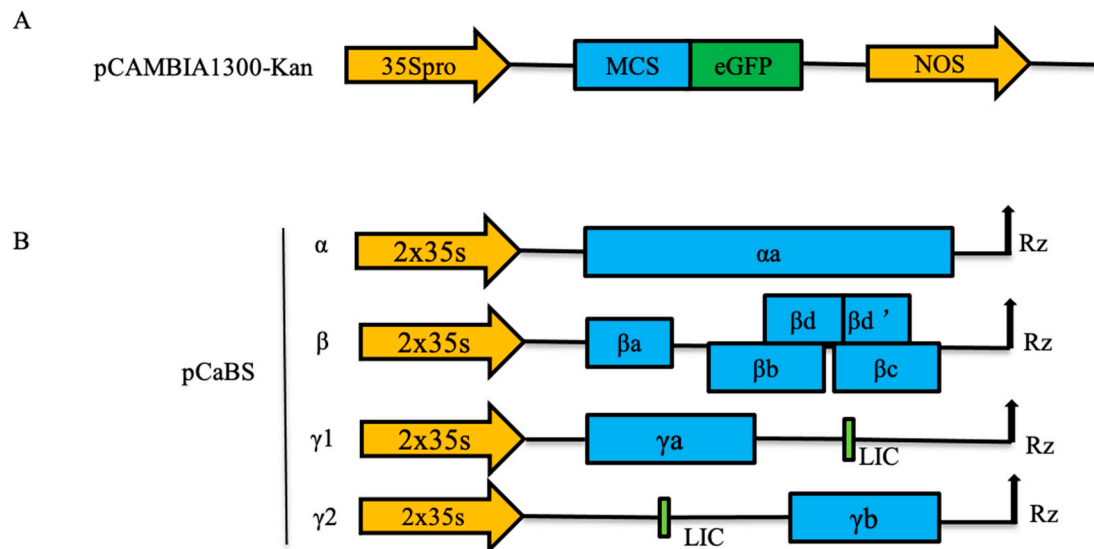

**Figure S5.** Schematic representation of the expression construct and virus vector. A. Schematic representation of the expression vector; B. Schematic representation of the four-component BSMV system. In the pCaBS- $\alpha$ , pCaBS- $\beta$ , pCaBS- $\gamma$ 1, and pCaBS- $\gamma$ 2 vectors, the  $\alpha$ ,  $\beta$ ,  $\gamma$ 1, and  $\gamma$ 2 cDNAs were cloned between the double cauliflower mosaic virus 35S promoter and a ribozyme sequence (Rz) in the pCass4-Rz plasmid. A LIC cloning site containing an *Apal* site was inserted into the  $\gamma$ 2 genome to substitute the  $\gamma$ b genes from the original  $\gamma$  genome.

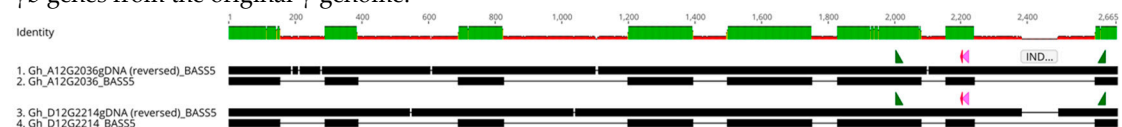

**Figure S6.** The alignment of cDNAs and genome DNA sequence between *GhBASS5A* and *GhBASS5D*. The black boxes and lines indicated exons and introns, respectively; the two green triangles showed the

position of primers for CAPs analysis; the purple arrows indicated the PAM site; the gray INDEL box represented the 109 bp indel sequence between *gGhBASS5A* and *gGhBASS5D*.

**Table S1.** Cotton organelle marker genes and their primer information (sequence underlined is the position of the introduced cleavage site).

| Organelles                 | Cotton label | Primer sequence(5' to 3' )                                                     | Length  | Temperature |
|----------------------------|--------------|--------------------------------------------------------------------------------|---------|-------------|
| Nucleus (NU)               | Gh_A07G0281  | F:CGAGGATCCATGAACCACAACCCGCAATCC<br>R:GCATCTAGAAATTCCTCTCTAGAAGCGGGATCG        | 411 bp  | 62 °C       |
| Endoplasmic reticulum (ER) | Gh_A05G0593  | F:CGCGGATCCATGAAGAACACTGAAAGACTCGCC'<br>R:TGCTCTAGATACATCAAATCTCAATGCTAGGGC'   | 765 bp  | 62 °C       |
| Plasma membrane (PM)       | Gh_D03G1822  | F:CGAGGATCCATGACTAAGGATATTGAGACCACGG<br>R:GCATCTAGAAAGCATTGCTCCTGAAAGATCCAAGG  | 876 bp  | 61 °C       |
| Mitochondria (MT)          | Gh_A12G2471  | F:CGAGGATCCATGGCAGCTCGTAGAATCTCTTC<br>R:GCATCTAGACAACCATGCTGGATTCTTCAAAGG      | 1623 bp | 62 °C       |
| Tonoplast (TP)             | Gh_A04G1393  | F:CGATGGATCCATGCCGATCAGAAACATAGCAG<br>R:GCATCTAGAAATAATCGGTGGTTGGGAGCTGCTCG    | 756 bp  | 62 °C       |
| Plastids (PL)              | Gh_A09G2205  | F:CGCGGATCCATGGAGGTTTTATCTTCTTCGTCCTTC<br>R:TGCTCTAGATGTACCAGATCCTATAAGTGTGTGG | 1200 bp | 64 °C       |
| Golgi body (GB)            | Gh_A02G0907  | F:CGCGGATCCATGGCGAGGAGTAGATCATCGTCAT<br>R:TGCTCTAGACAGTAGTAGTATCCCAAGCAGGTAG   | 628 bp  | 62 °C       |
| Peroxisome (PR)            | Gh_A03G1812  | F:CGAGGATCCATGGCGTTTCCAGTAGTCGATACCG<br>R:GCATCTAGAACTTCATTCTTTTGGCGACCTCGT    | 867 bp  | 63 °C       |

**Table S2.** LIC primers and qPCR primers used in this study

| Primer          | Primer sequence(5' to 3' )                                                           | Length  |
|-----------------|--------------------------------------------------------------------------------------|---------|
| LIC-NU-GFP      | F:AAGGAAGTTTAAATGAACCACAACCCGCAAT<br>R:CGGGCCAGCCACCGCCACCAGTTTACTTGTACAGCTCGTCCATGC | 1137 bp |
| LIC-MT-GFP      | F:AAGGAAGTTTAAATGGCAGCTCGTAGAATC<br>R:CGGGCCAGCCACCGCCACCAGTTTACTTGTACAGCTCGTCCATGC  | 2340 bp |
| LIC-ER-GFP      | F:AAGGAAGTTTAAATGAAGAACACTGAAAGAC<br>R:CGGGCCAGCCACCGCCACCAGTTTACTTGTACAGCTCGTCCATGC | 1491 bp |
| LIC-PM-GFP      | F:AAGGAAGTTTAAATGGAGGGTAAAGAAGAAG<br>R:CGGGCCAGCCACCGCCACCAGTTTACTTGTACAGCTCGTCCATGC | 1593 bp |
| LIC-TP-GFP      | F:AAGGAAGTTTAAATGCCGATCAGAAACATAG<br>R:CGGGCCAGCCACCGCCACCAGTTTACTTGTACAGCTCGTCCATGC | 1482 bp |
| LIC-PL-GFP      | F:AAGGAAGTTTAAATGGAGGTTTTATCTTCT<br>R:CGGGCCAGCCACCGCCACCAGTTTACTTGTACAGCTCGTCCATGC  | 1926 bp |
| LIC-GB-GFP      | F:AAGGAAGTTTAAATGGCGAGGAGTAGATCAT<br>R:CGGGCCAGCCACCGCCACCAGTTTACTTGTACAGCTCGTCCATGC | 1354 bp |
| LIC-PR-GFP      | F:AAGGAAGTTTAAATGGCGTTTCCAGTAGTC<br>R:CGGGCCAGCCACCGCCACCAGTTTACTTGTACAGCTCGTCCATGC  | 1593 bp |
| LIC-GFP         | F:AAGGAAGTTTAAATGGTGAGCAAGGGCGAG<br>R:CGGGCCAGCCACCGCCACCAGTTTACTTGTACAGCTCGTCCATGC  | 720 bp  |
| LIC-GhBASS5-GFP | F:AAGGAAGTTTAAATGAGTTCAACCACTGG<br>R:CGGGCCAGCCACCGCCACCAGTTTACTTGTACAGCTCG          | 1950 bp |
| qPCR-GFP        | F:GGTGATGTTAATGGGCAC<br>R:TCAGGCATGGCACTCTTGA                                        | 212 bp  |
| UBQ7            | F:AGAGGTCGAGTCTTCGGACA<br>R:GCTTGATCTTCTTGGGCTTG                                     | 146 bp  |
| A-GFP           | F:ATGGTGAGCAAGGGCGAG<br>R:TTACTTGTACAGCTCGTCCATGC                                    | 720 bp  |

**Table S3.** Primers used for detection of gene editing

| Primer               | Primer sequence(5' to 3' )                                                              | Purpose of primers            |
|----------------------|-----------------------------------------------------------------------------------------|-------------------------------|
| <i>GhBASS5-BamHI</i> | F:GTTATTTCTCAGTGGTTCCT<br>R:AGCGAAGCCCATCAATGACA                                        | Amplification of DNA fragment |
| BSMV- $\alpha$       | F:CCATCGTCGATTCCGTGGAT R:CCTCGCATTTGCATCAGCTC                                           | RT-PCR                        |
| BSMV- $\beta$        | F:GCACCCTAGAACGTGAACGA R:AGCGAAGCAGTCTCTTGTC                                            | RT-PCR                        |
| BSMV- $\gamma$ 1     | F:TTCGACTTCAAGTACCCCGC R:TAGTCGAATCAGTAGCAACC                                           | RT-PCR                        |
| Cas9N                | F:GCTCTAGAATGGATTACAAGGACCACGAC<br>R:CGAGCTCGCTCACCTGAGCCTTCTGGA                        | RT-PCR                        |
| Cas9C                | F:GCTCTAGAATGGGCCAGGGGGACTCGCTG<br>R:CGAGCTCTCACTTCTTCTTCTTCGCCTGC                      | RT-PCR                        |
| $\gamma$ 2-Cas9N     | F:AAGGAAGTTTAAATGGATTACAAGGACCACGAC<br>R:CGGGCCAGCCACCGCCACCAGTTCAGCTCACCTGAGCCTTCTGGA  | Clone $\gamma$ 2-Cas9N        |
| $\gamma$ 2-Cas9C     | F:AAGGAAGTTTAAATGGGCCAGGGGGACTCGCTG<br>R:CGGGCCAGCCACCGCCACCAGTTCAGTTCCTTCTTCTTCGCCTGCC | Clone $\gamma$ 2-Cas9C        |

Video S1. Time series of fluorescence signal of GhBASS5-GFP in cotton leaf.
